# Supplementary material
Source: Springer Nature journal article supplement (https://www.springermedizin.de/resource/supplementary/12885_2009_1760_MOESM3_ESM.pdf/9472864)
Supplement: MOESM3 [file 9472864]

## Overall survival

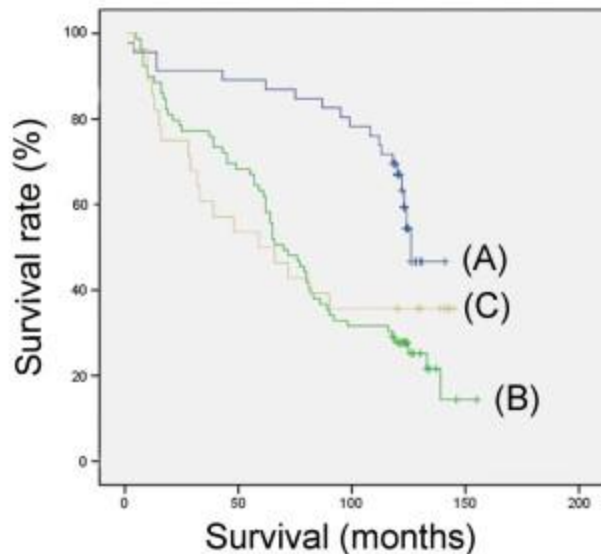

## HIWI overall expression

(A) Low expression (n=46)

(B) Moderate expression (n=79)

(C) High expression (n=28)

(A) vs (B)  $P < 0.001$   $\chi^2 = 15.715$

(A) vs (C)  $P = 0.014$   $\chi^2 = 6.053$

(B) vs (C)  $P = 0.592$   $\chi^2 = 0.287$
